# Supplementary figures and images for: Optimal machine learning methods for radiomic prediction models: Clinical application for preoperative T2 *‐weighted images of cervical spondylotic myelopathy
Source: PubMed Central journal article supplement — JOR Spine. 2021 Nov 13;4(4):e1178. doi: 10.1002/jsp2.1178 (PMC8717093; doi:10.1002/jsp2.1178), 2021-11-13

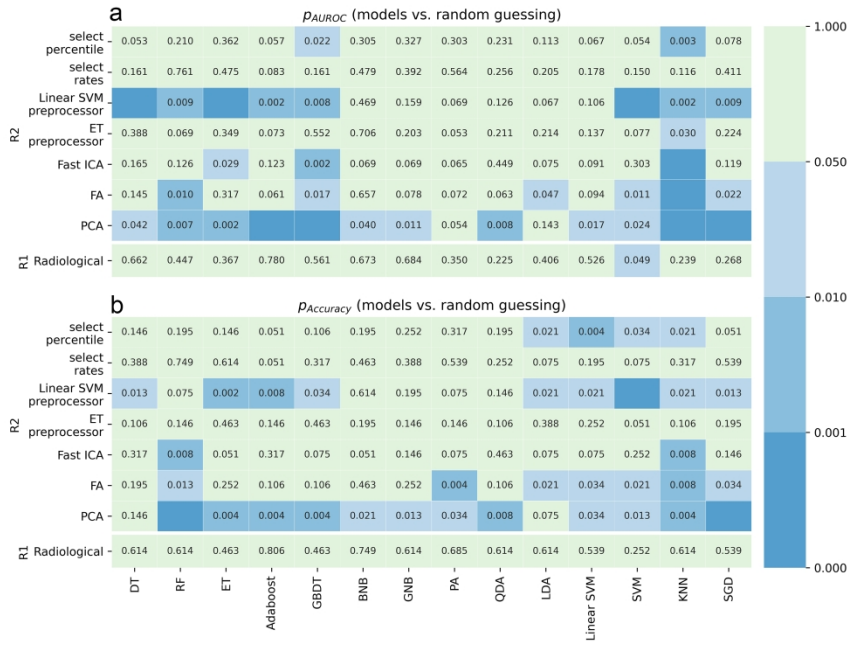

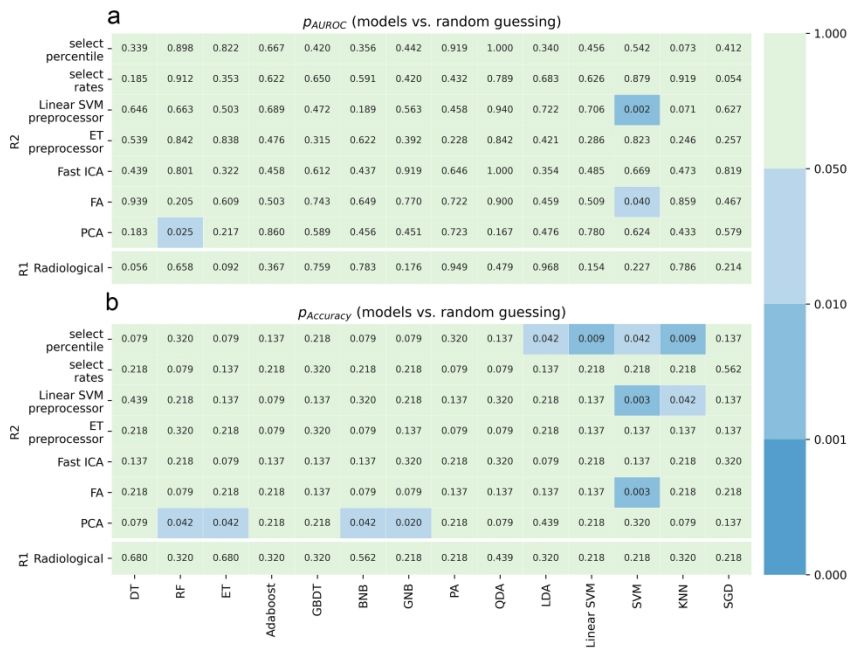

Supplement: JSP2-4-e1178-s002.pdf [file JSP2-4-e1178-s002.pdf]
